# Supplementary material for: A magnetite/oxidized carbon nanotube composite used as an adsorbent and a matrix of MALDI-TOF-MS for the determination of benzo[a]pyrene
Source: Royal Society of Chemistry journal article supplement (doi:10.1039/c1cc13166d), 2011-01-01
Supplement: c1cc13166d.pdf [file c1cc13166d.pdf]

# Supporting Information

## **Magnetite/oxidized carbon nanotube composite used as adsorbent and matrix of MALDI-TOF-MS for the determination of benzo[a]pyrene†**

Xiao-Shui Li, Jian-Hong Wu, Li-Dan Xu, Qin Zhao, Yan-Bo Luo, Bi-Feng Yuan,

Yu-Qi Feng\*

Key Laboratory of Analytical Chemistry for Biology and Medicine (Ministry of  
Education), Department of Chemistry, Wuhan University, Wuhan 430072, P.R. China

\*Corresponding author:

Yu-Qi Feng, Department of Chemistry, Wuhan University, Wuhan 430072, P.R.  
China

Tel: +86-27-68755595; Fax: +86-27-68755595;

E-mail: [yqfeng@whu.edu.cn](mailto:yqfeng@whu.edu.cn)

## Experimental details

**Chemicals and reagents.** Benzo[a]pyrene (BaP) (2.0 mg/mL in Dichloromethane) was bought from J&K Chemical Ltd. Carbon nanotube (CNT) and oxidized carbon nanotube (OCNT) were purchased from Nanotech Port Co. (Shenzhen, China) and C60 was purchased from Yongxin Co. (Henan, China). 2,5-dihydroxybenzoic acid (2,5-DHB),  $\alpha$ -cyano-4-hydroxycinnamic (CHCA), sinapic acid (SA) and trifluoroacetic (TFA) were purchased from Sigma-Aldrich (St. Louis, Missouri, USA). Methanol, acetone and n-hexane were HPLC grade and purified water was obtained with a Milli-Q apparatus (Millipore, Bedford, Massachusetts, USA). The other chemical reagents were of analytical grade and were used without further purification.

**Preparation of BaP solution.** BaP was dissolved in acetone at a concentration of 1 ppm as storage solution, which was then diluted to different concentrations (500  $\mu$ g/L, 100  $\mu$ g/L, 50  $\mu$ g/L, 10  $\mu$ g/L) upon use. The volume of each diluted solution for MALDI analysis is 1  $\mu$ L. Therefore, the amounts of the analyte are 500 pg, 100 pg, 50 pg, 10 pg, respectively. All storage solutions were stored at 4°C.

**Synthesis grapheme (G) and graphene oxide (GO).** Graphene oxide (GO) was synthesized from graphite powder by a modified Hummers and Offeman method<sup>1</sup>, and Graphene was prepared using a low-temperature thermal reduction method<sup>2</sup>. Characterizations of the materials were described in our previous work<sup>3</sup>.

**Sample preparation for MALDI-TOF-MS.** The CNT, OCNT and C60 were washed successively with acetone, methanol and water. Then, 2 mg of G, CNT and C60 was

suspended in 1 ml of water/ethanol (1:1, v/v) with sonication for three minutes, while GO and OCNT were prepared in water. Similar to our previous work,<sup>3</sup> magnetite/oxidized carbon nanotube complex ( $\text{Fe}_3\text{O}_4@\text{SiO}_2/\text{OCNT}$ ) was prepared by mixing 8 mg  $\text{Fe}_3\text{O}_4@\text{SiO}_2$  and 2 mg OCNT in 1 ml water/*N,N*-Dimethylformamide (1:1, v/v). After washing with DMF and acetone,  $\text{Fe}_3\text{O}_4@\text{SiO}_2/\text{OCNT}$  was dispersive in 1 ml acetone. The same concentration of  $\text{Fe}_3\text{O}_4@\text{SiO}_2$  was prepared in pure water for comparison. About 1  $\mu\text{L}$  solution of matrix was applied to a stainless steel target probe, then 1  $\mu\text{L}$  analyte solution was pipetted on the top of the matrix layer and dried at ambient conditions followed analysis by MALDI-TOF-MS.

**Magnetic solid phase extraction procedure.** The extraction procedure of BaP with  $\text{Fe}_3\text{O}_4@\text{SiO}_2/\text{OCNT}$  is as follows.

*Extraction of BaP from n-hexane.* 1 mL of n-hexane was spiked with stock solution to get final concentrations of BaP at 0.4, 2, 10, 50  $\mu\text{g/L}$ . After 20  $\mu\text{L}$  of  $\text{Fe}_3\text{O}_4@\text{SiO}_2/\text{OCNT}$  suspension were added into the solution, the suspension was vortexed vigorously for 10 min for extraction. Then the magnetic material-target conjugate was gathered to the bottom of the vial by applying an external magnet, and the supernatant was decanted. Finally, the magnetic materials were suspended in 2  $\mu\text{L}$  methanol and 1  $\mu\text{L}$  of the magnetic material-target conjugate was pipetted onto the stainless steel target probe.

*Extraction of BaP from pure water.* 10 mL of pure water were spiked with stock solution to get final concentrations of BaP at 50, 100, 500, 1000  $\text{ng/L}$ . After 20  $\mu\text{L}$  of  $\text{Fe}_3\text{O}_4@\text{SiO}_2/\text{OCNT}$  suspension were added into the solution, the suspension was

1 incubated at 40 °C for 30 min. The following procedure was the same as the extraction  
2 of BaP from n-hexane.

3 **Instrument conditions.** MALDI-TOF-MS spectra were collected with an Axima  
4 TOF<sup>2</sup> mass spectrometry (Shimadzu, Kyoto, Japan). The instrument was equipped  
5 with a 337 nm nitrogen laser with a 3 ns pulse width. All the mass spectra were  
6 performed in positive ion reflector mode with an accelerating voltage of 20 kV.  
7 Typically, 100 laser shots were averaged to generate each spectrum. Nonmagnetic  
8 matrix was performed by using a laser energy of 60 μJ, while magnetic matrix was  
9 performed at 70 μJ.

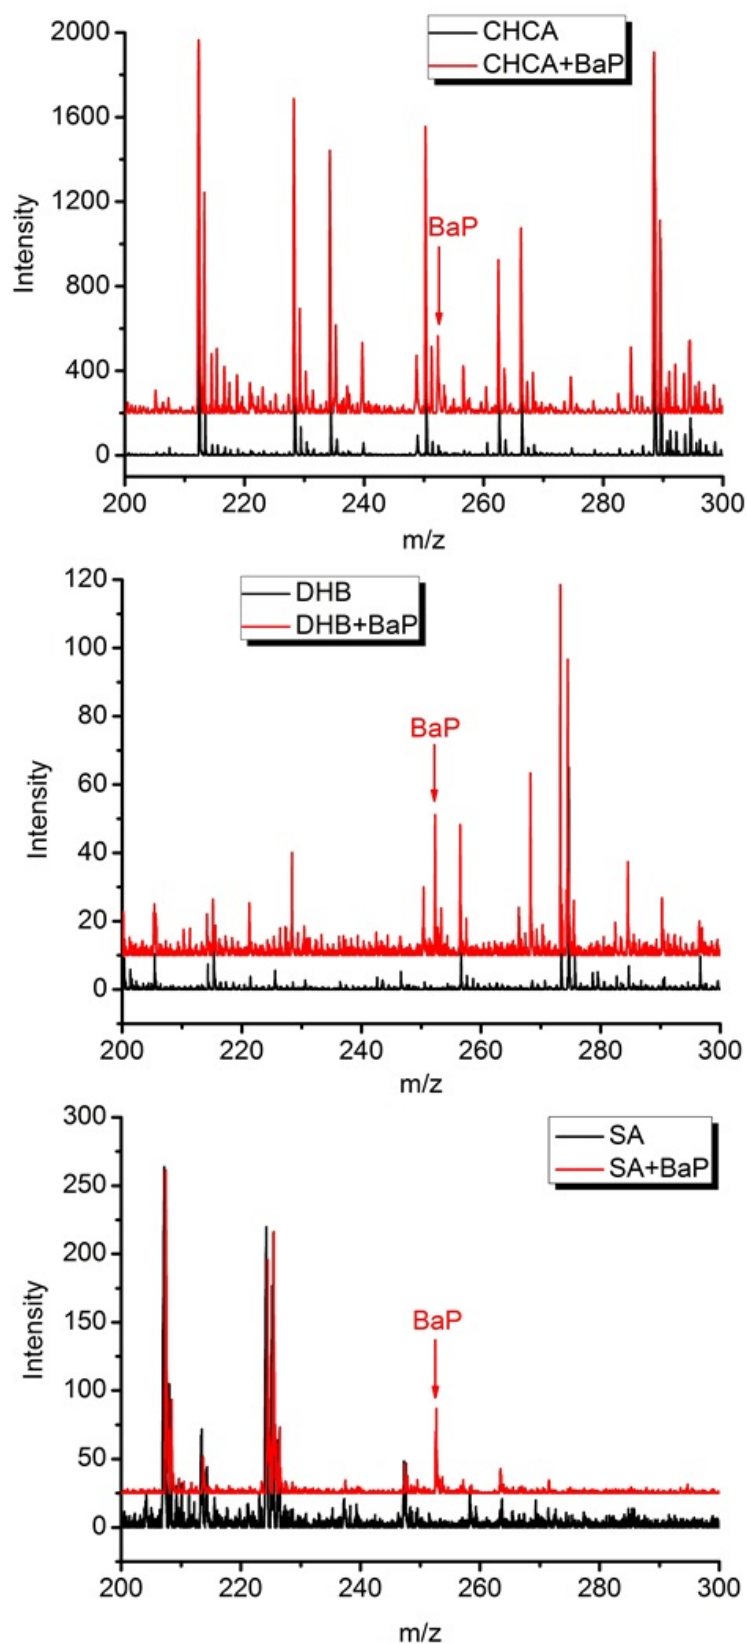

1

2 **Figure S1.** Mass spectra of BaP obtained by using CHCA, DHB, SA as the matrix of  
3 MALDI-TOF-MS.

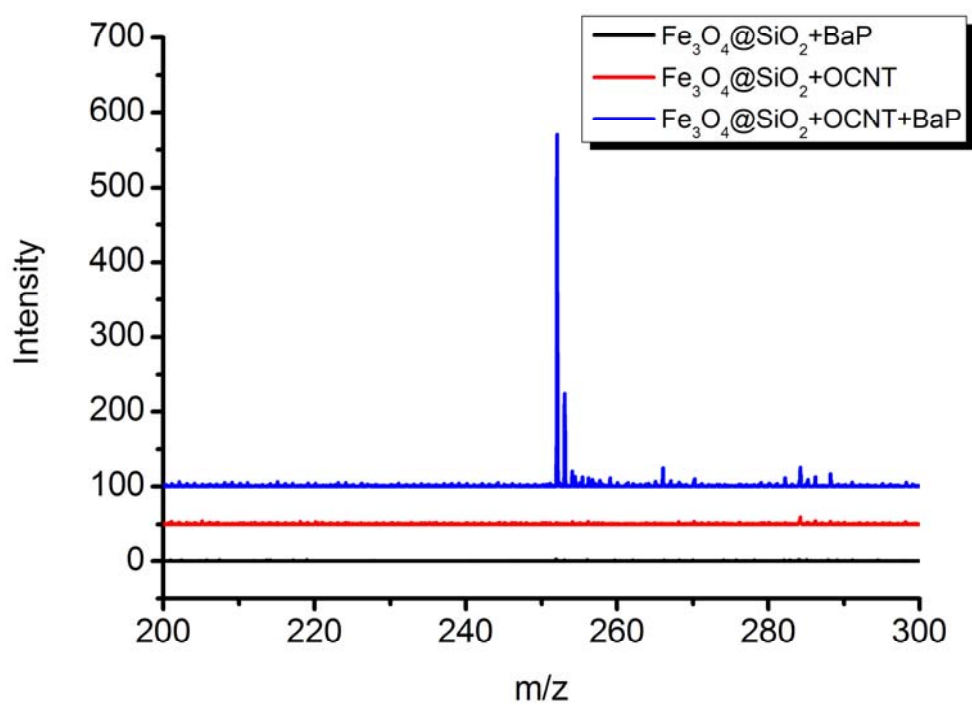

1  
2 **Figure S2.** Mass spectra of BaP obtained by using  $\text{Fe}_3\text{O}_4@\text{SiO}_2$  or  
3  $\text{Fe}_3\text{O}_4@\text{SiO}_2/\text{OCNT}$  as the matrix of MALDI-TOF-MS.

4

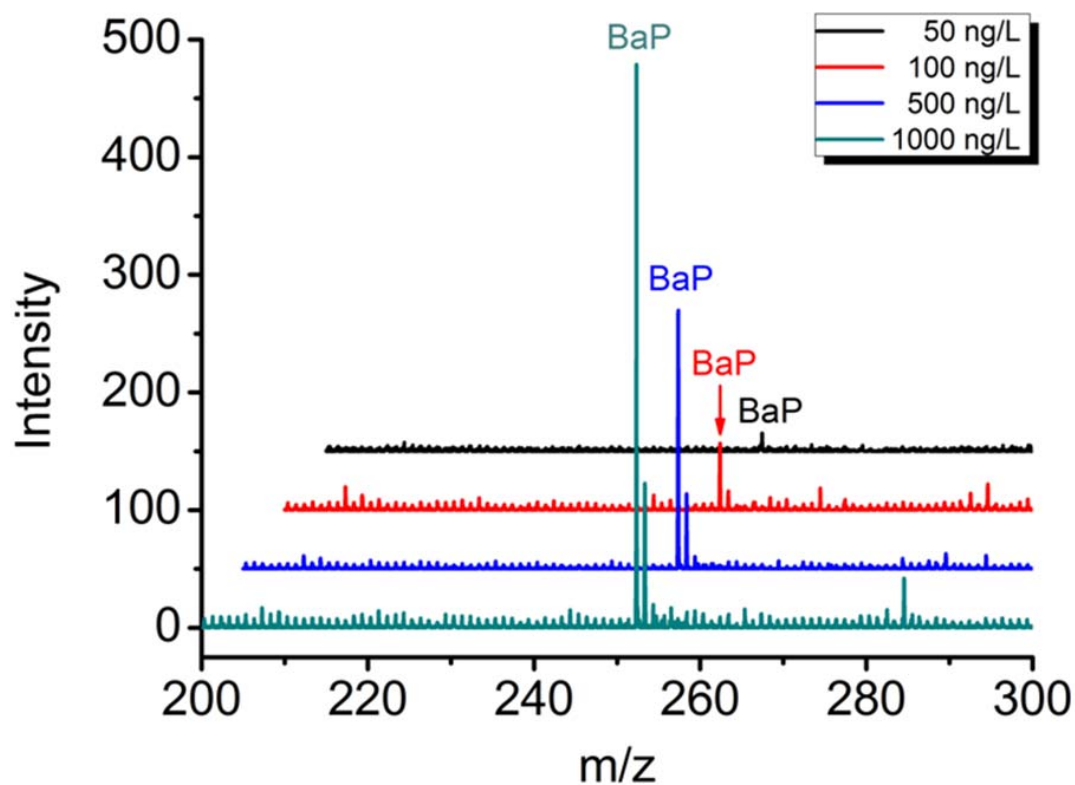

**Figure S3.** Mass spectra of BaP obtained after enrichment with  $\text{Fe}_3\text{O}_4@\text{SiO}_2/\text{OCNT}$  from 10 mL pure water.

## References:

- [1] Hummers W.S.; Offeman R.E. *J. Am. Chem. Soc.* **1958**, 10, 1339.
- [2] Chen W.F.; Yan L.F. *Nanoscale* **2010**, 2, 559-563.
- [3] Luo Y.B.; Shi Z.G.; Gao Q.; Feng Y.Q. *J. Chromatogr. A* **2011**, 1218, 1353-1358.
